# Supplementary material for: Study design requirements for RNA sequencing-based breast cancer diagnostics
Source: PubMed Central journal article supplement (PMC4735337; doi:10.1038/srep20200), 2016-02-01

## **Supplementary Information**

Study design requirements for RNA sequencing-based breast cancer diagnostics

Arvind Singh Mer, Daniel Klevebring, Henrik Gronberg and Mattias Rantalainen,

Department of Medical Epidemiology and Biostatistics,

Karolinska Institute,

Nobels Väg 12A, SE-17177

Stockholm, Sweden

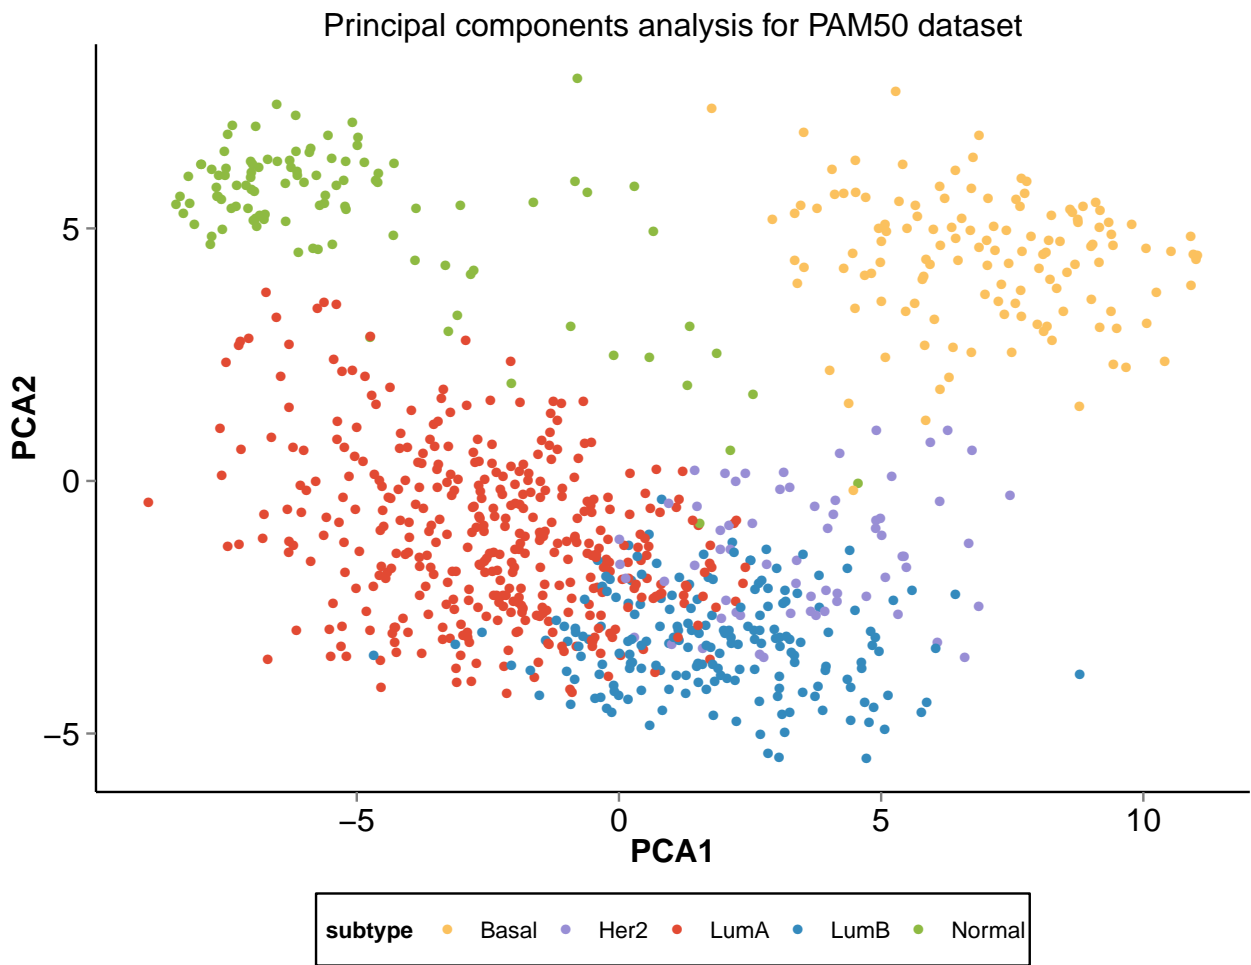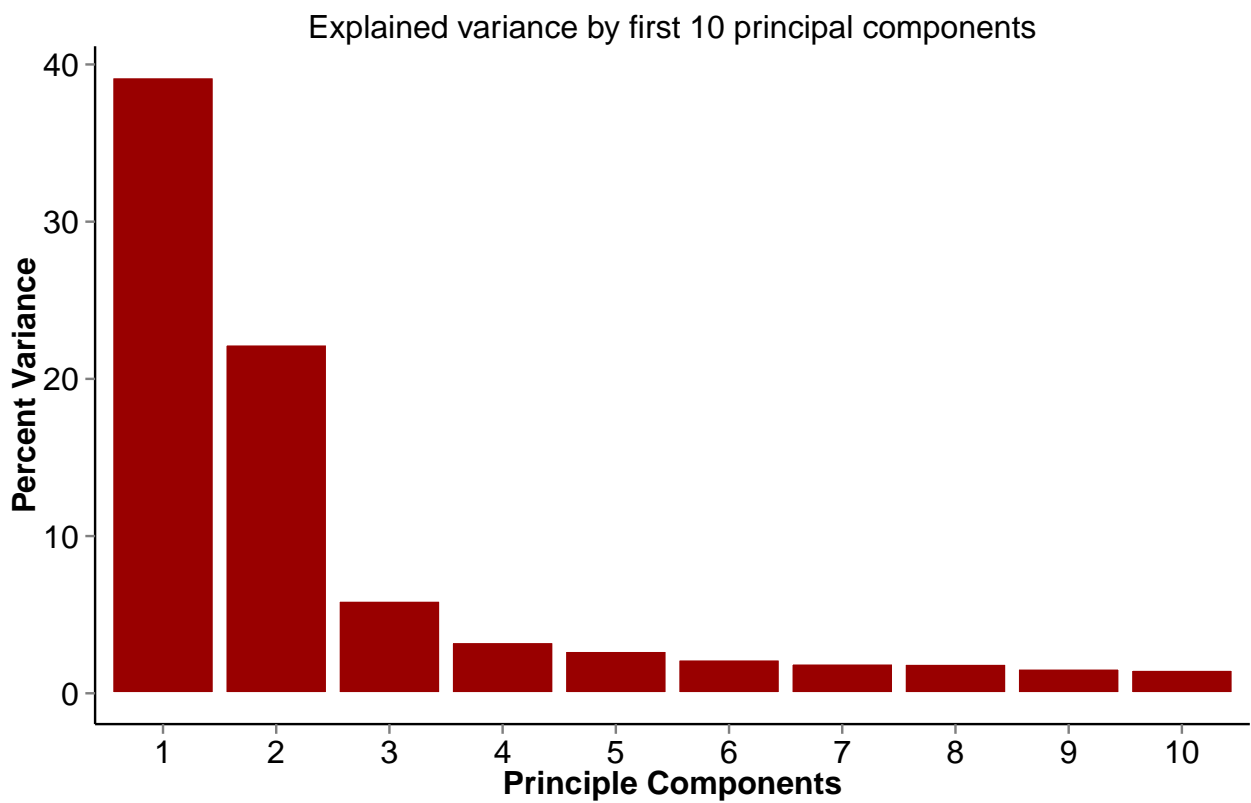

Figure S1: Principal component analysis of PAM50 dataset.

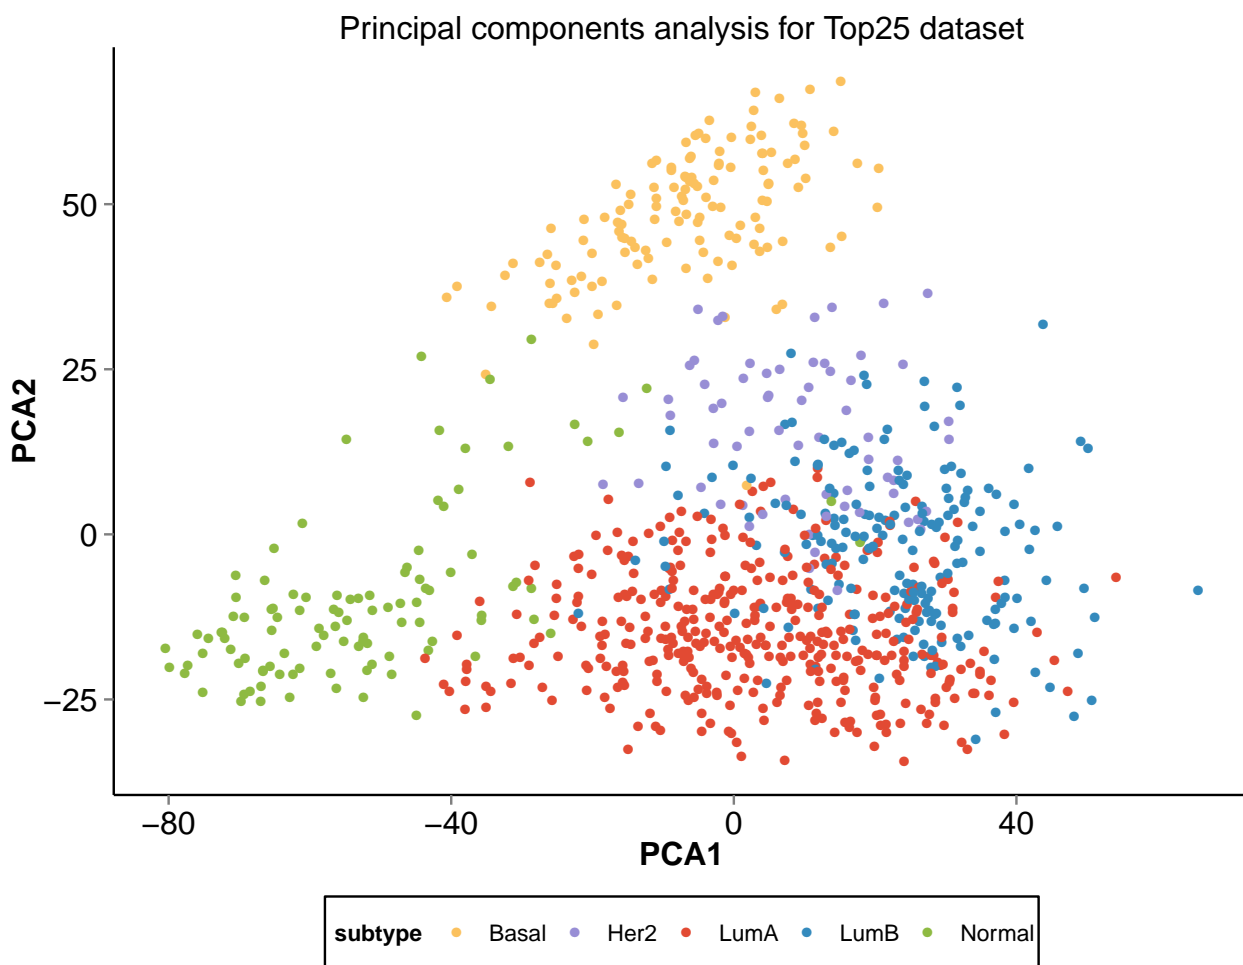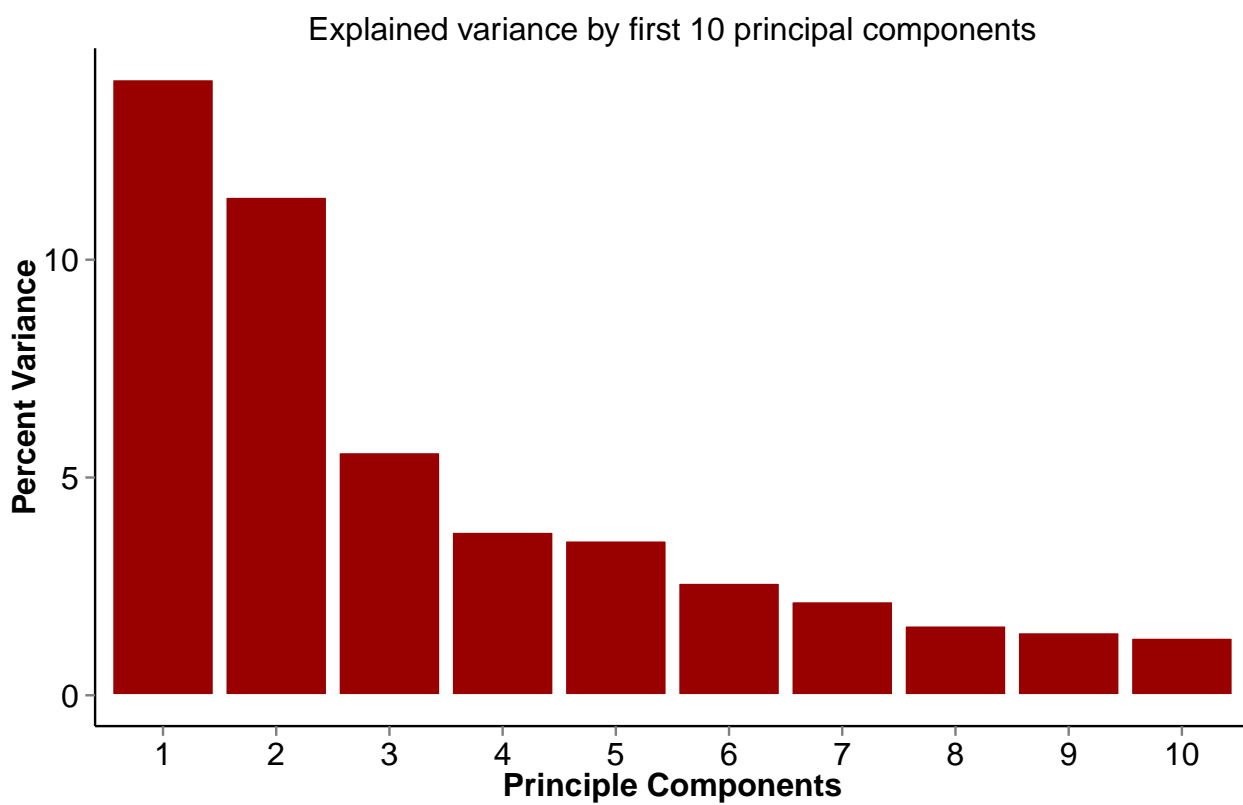

Figure S2: Principal component analysis of Top25 dataset.

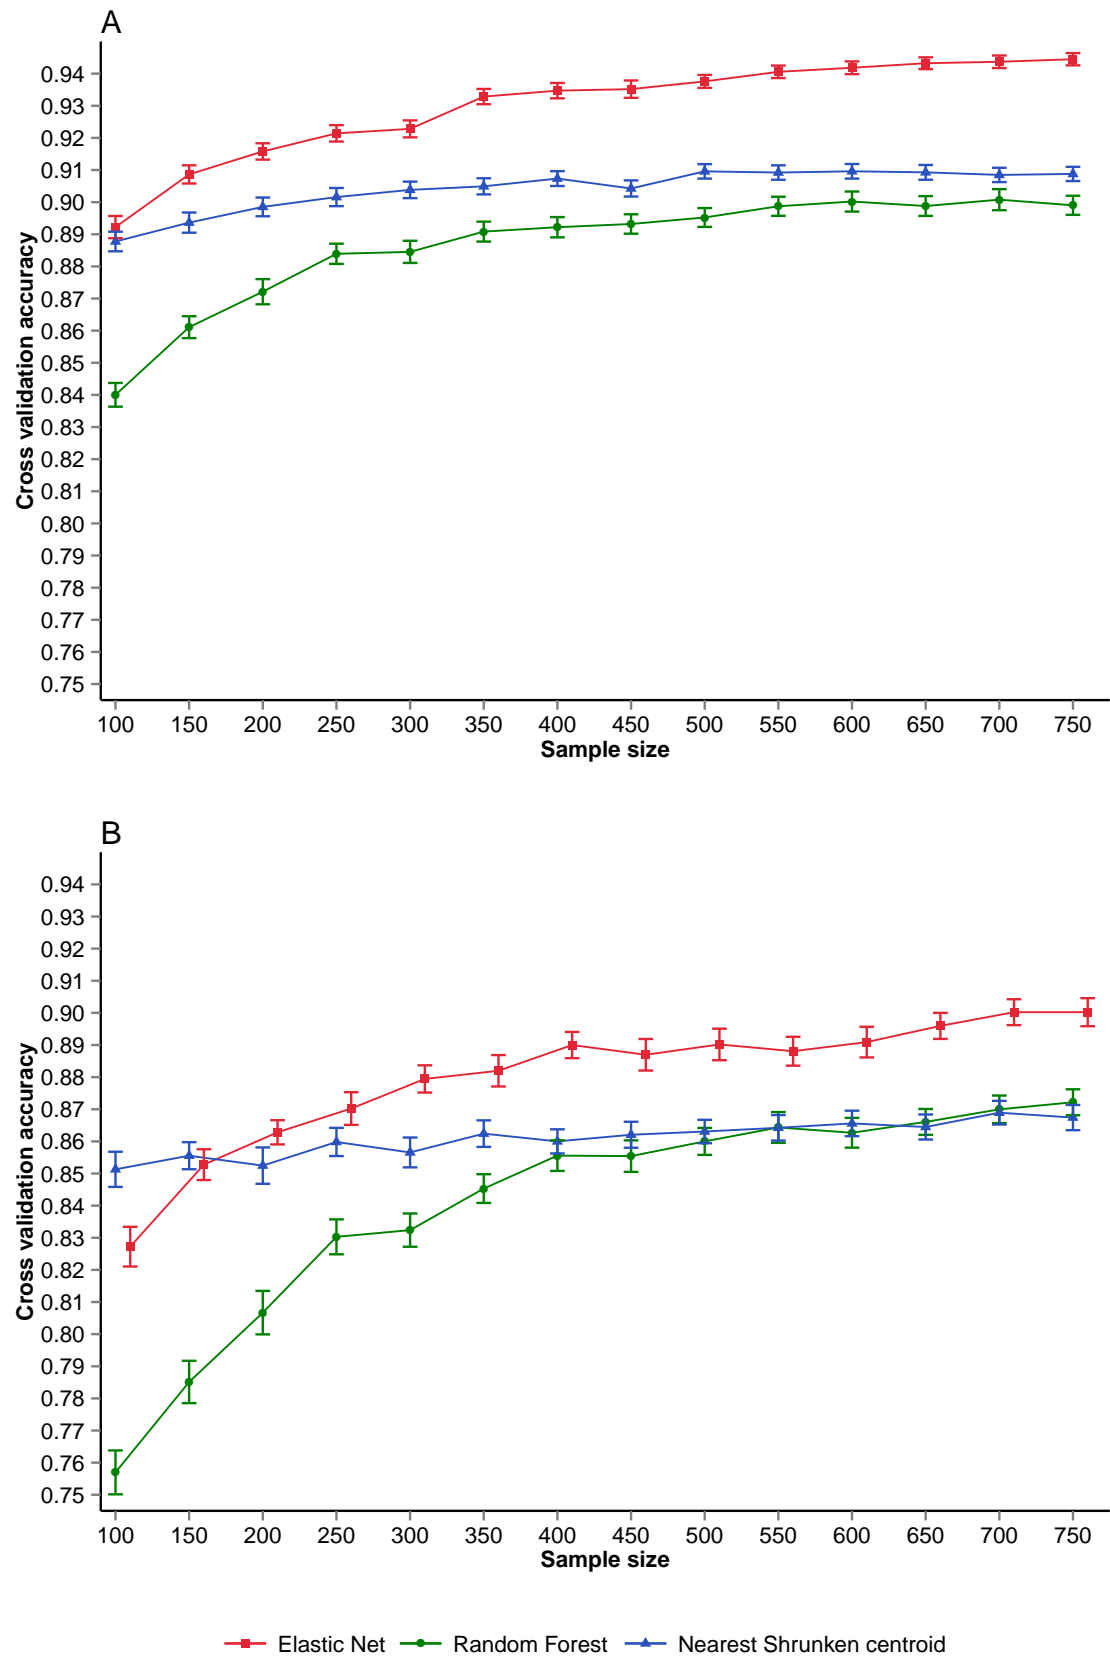

Figure S3: Balance accuracy for (A) PAM50 and (B) Top25 dataset.

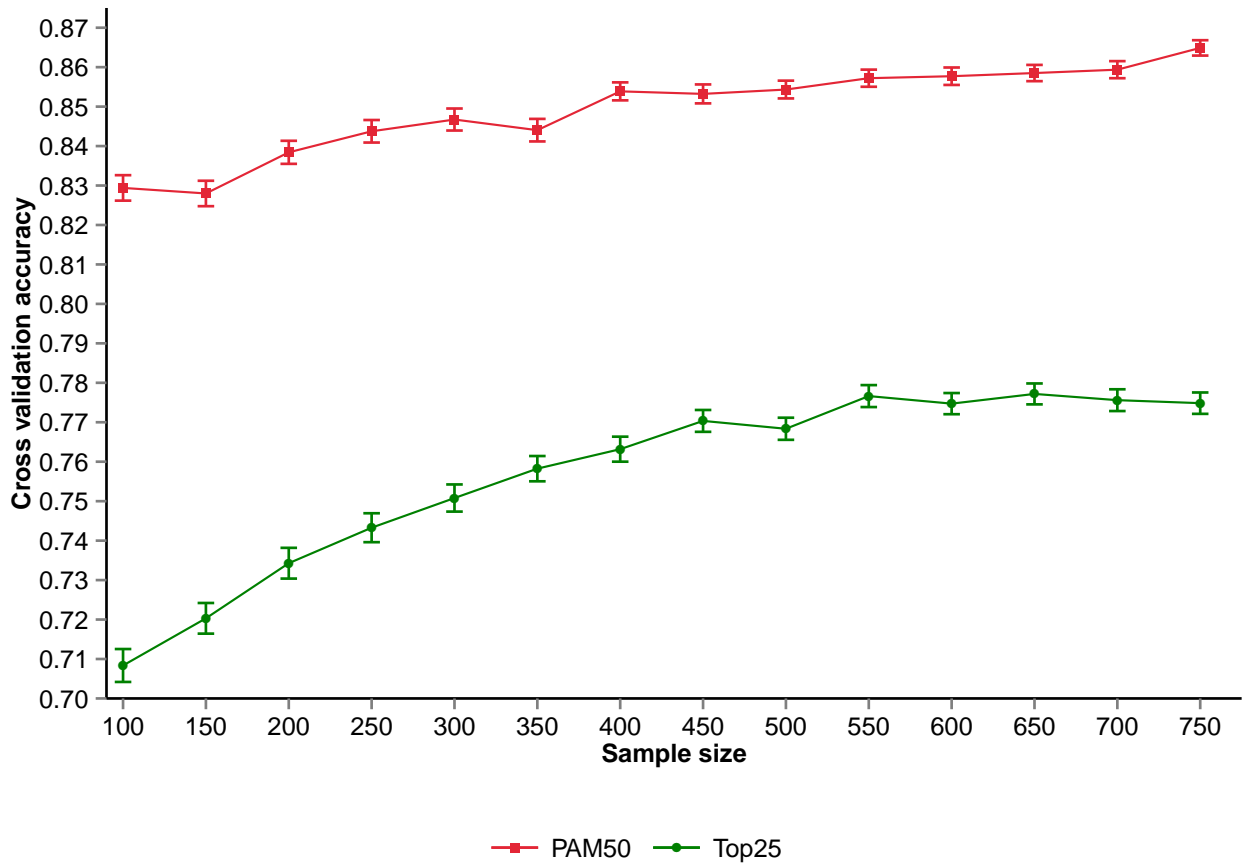

Figure S4: Balance accuracy for unsupervised classification.

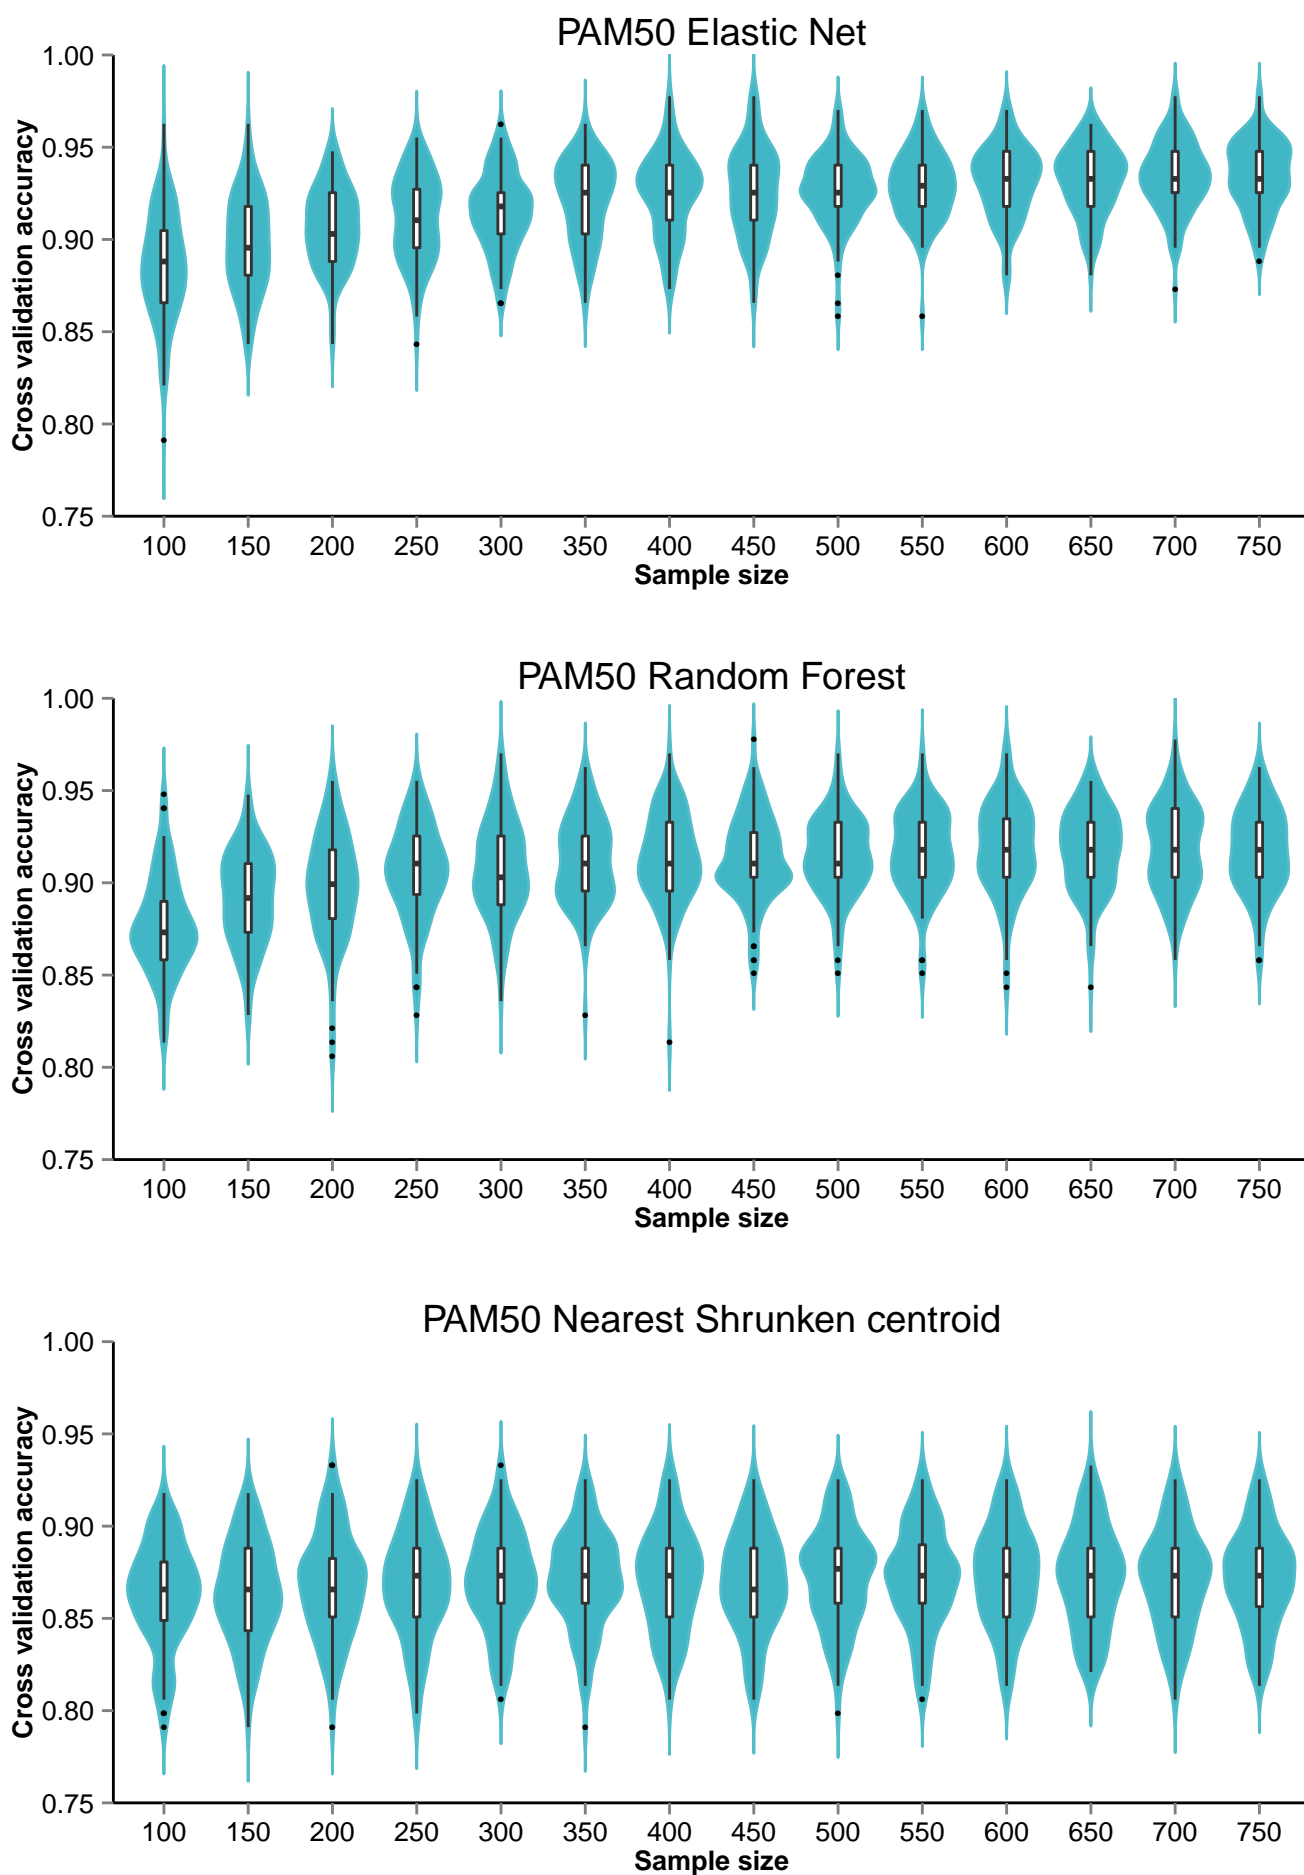

Figure S5: Violin plot visualisation of prediction accuracy over cross-validation rounds for PAM50 dataset at different training sample size

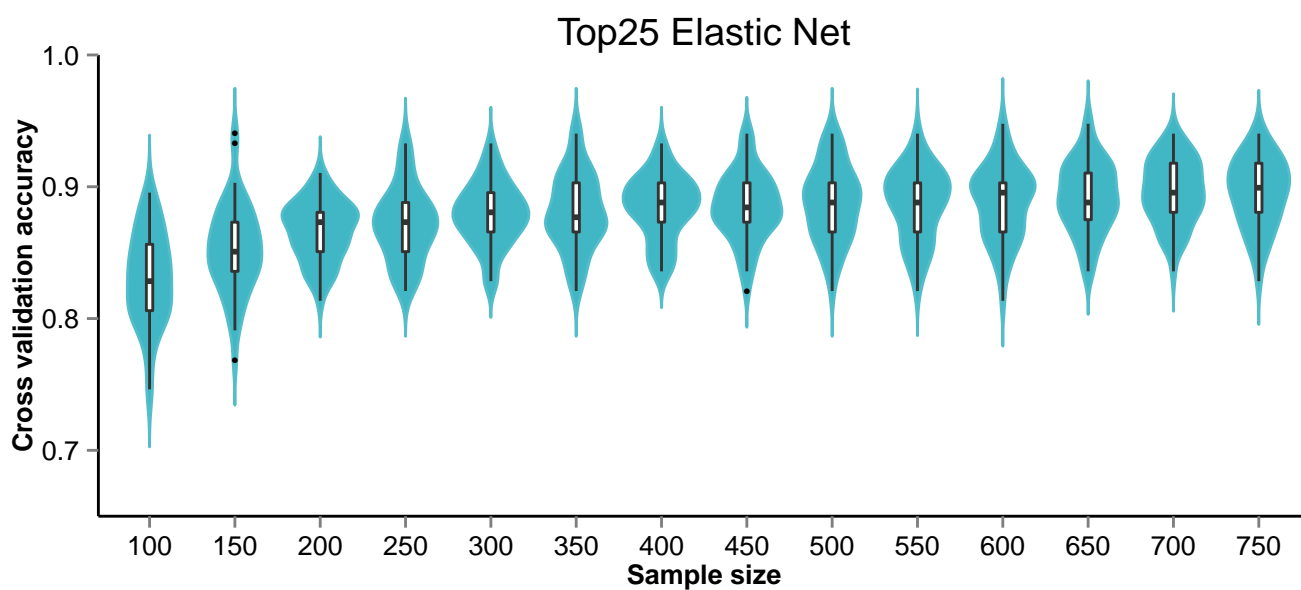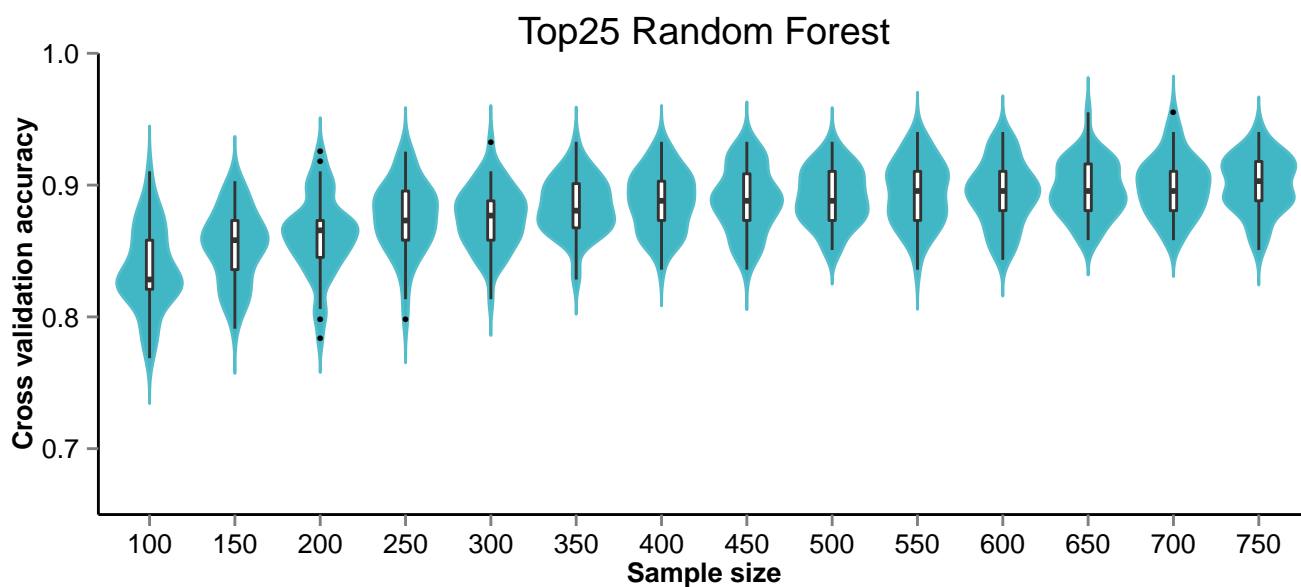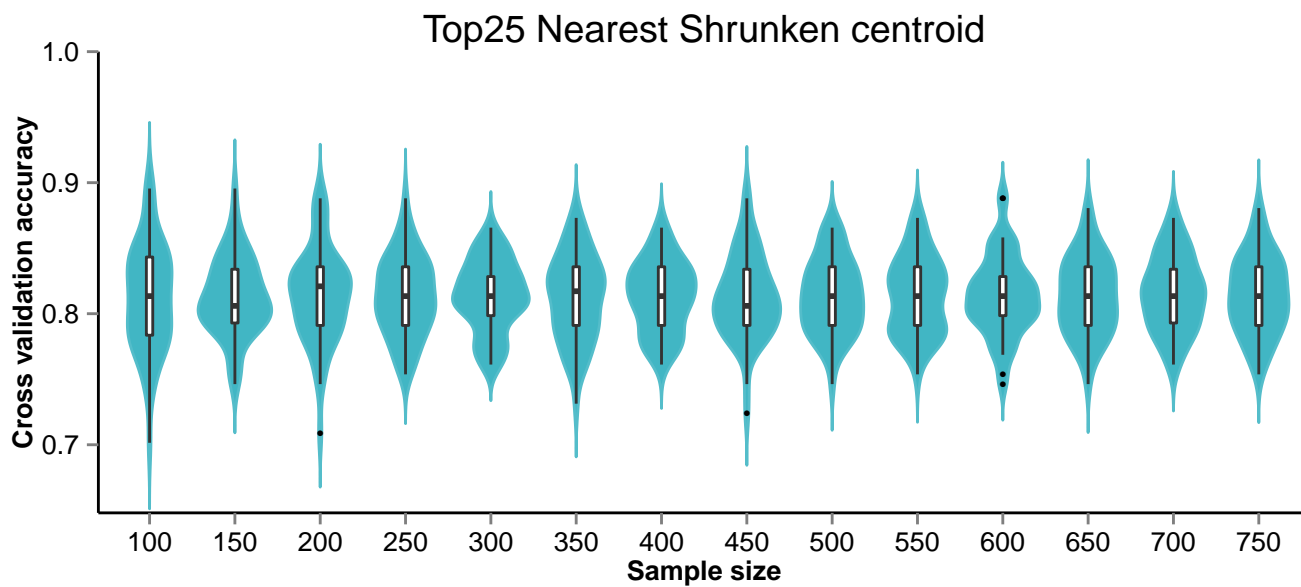

Figure S6: Violin plot visualisation of prediction accuracy over cross-validation rounds for Top25 dataset at different training sample size

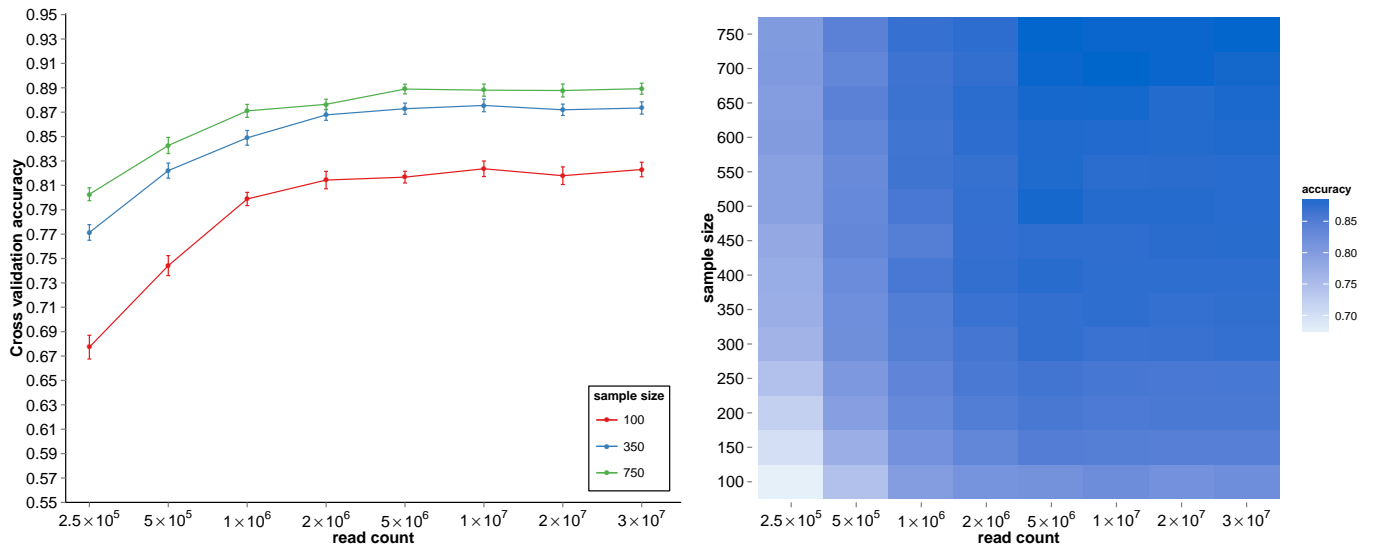

Figure S7: Effect of read count per sample on subtype prediction in Top25 dataset. (A) Classification accuracy at training sample size of 100, 350 and 750 (Error bars represent standard error of the cross-validation mean). (B) Heatmap representation of subtype classification accuracy and read count per sample



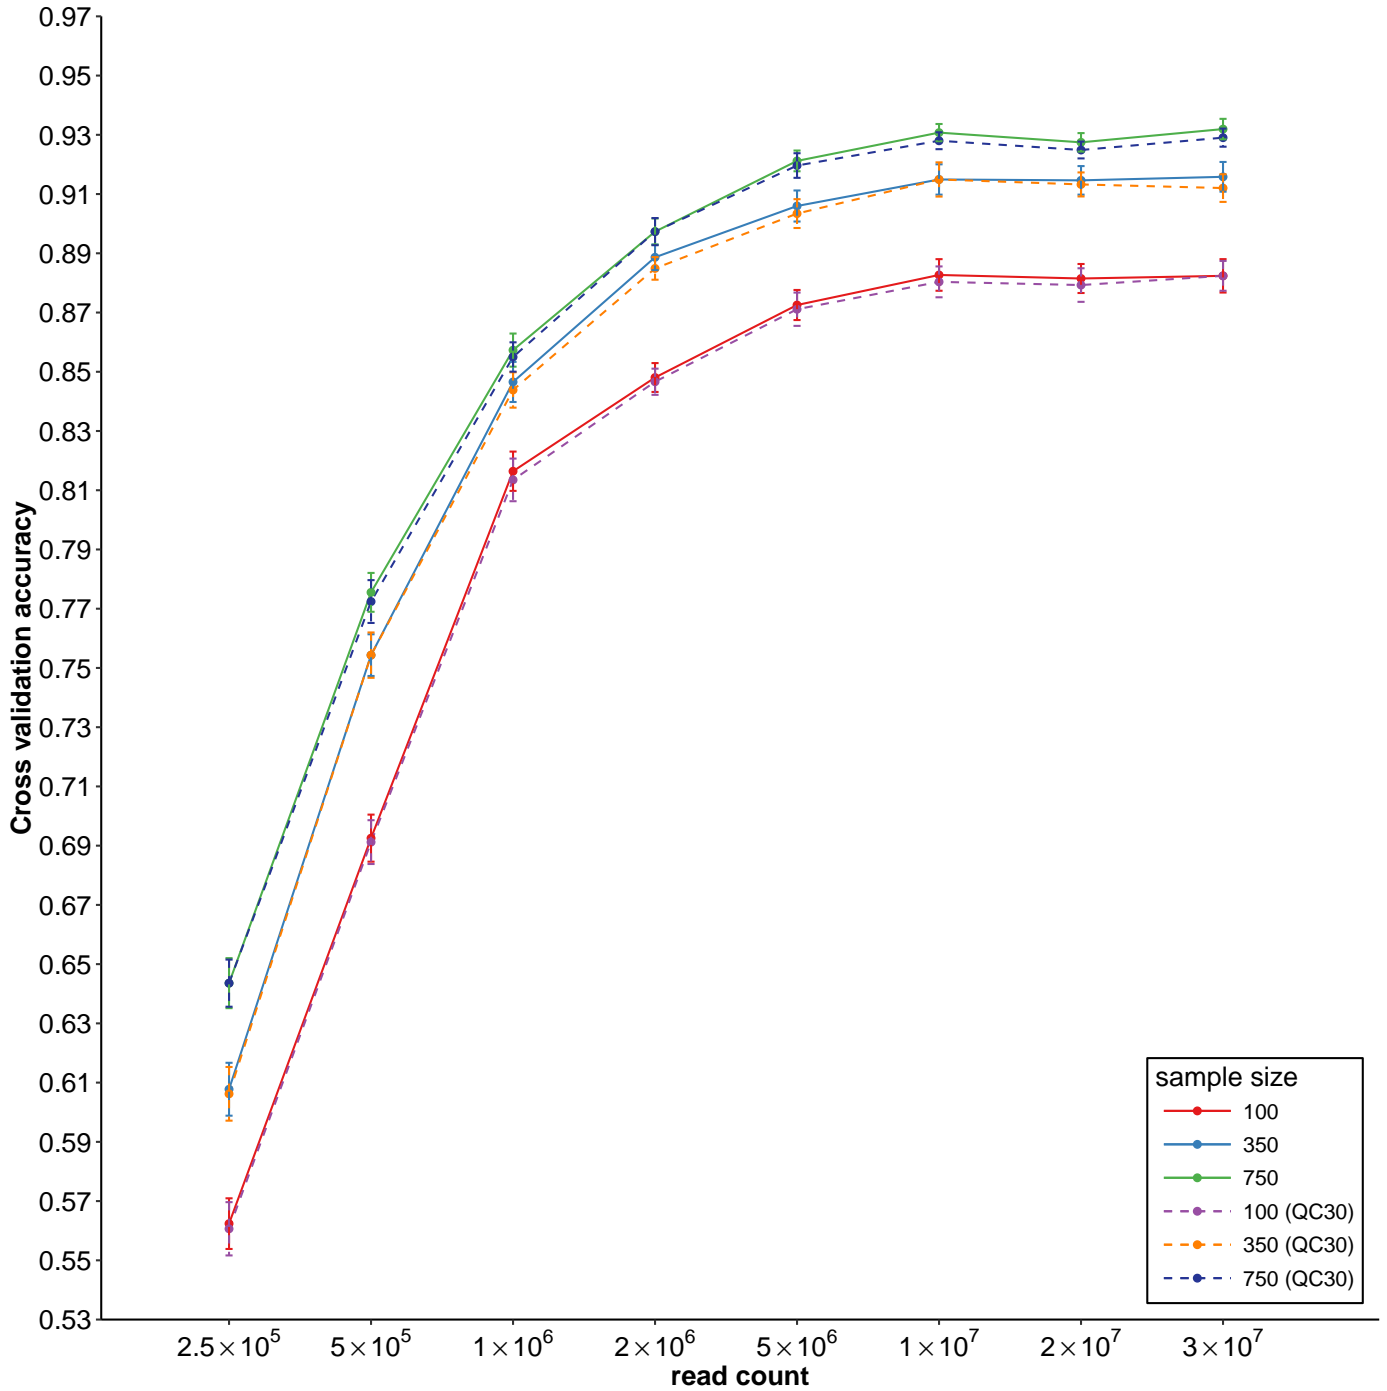

Figure S8: Effect of read count per sample on subtype prediction accuracy in PAM50 dataset, using htseq-count QC threshold 10 (solid lines) and QC threshold 30 (dashed lines). Classification accuracy at training sample size of 100, 350 and 750 (Error bars represent standard error of the cross-validation mean).

**Table S1: Confusion matrix for PAM50 dataset and Elastic net classifier**

**sample size 100**

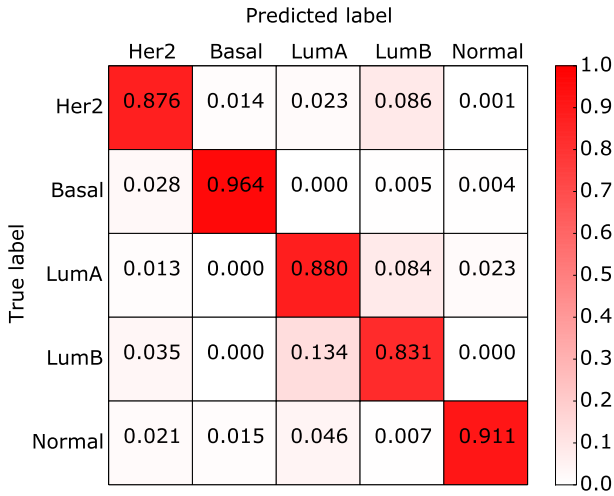

**sample size 150**

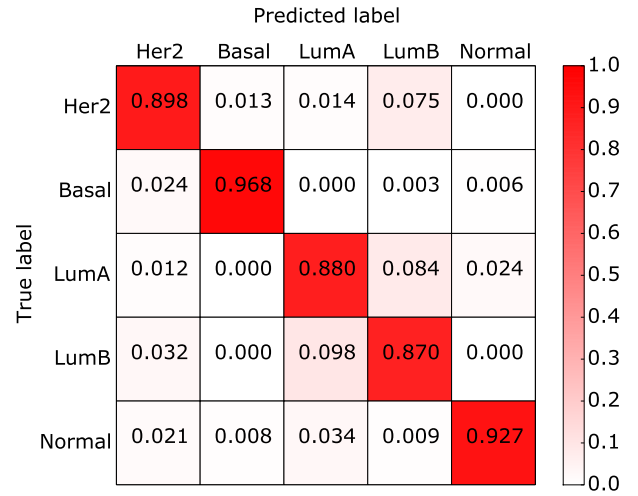

**sample size 200**

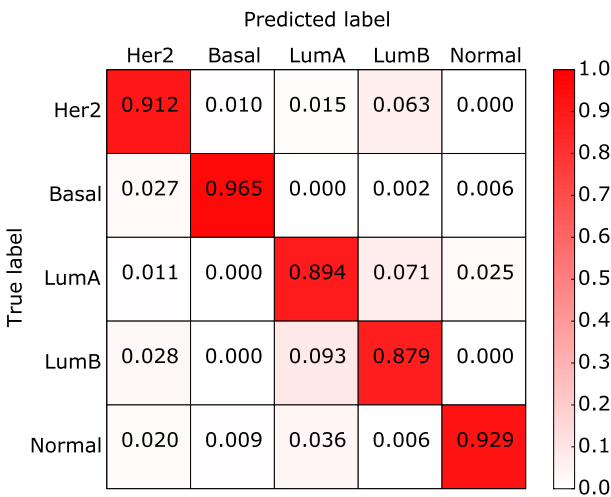

**sample size 250**

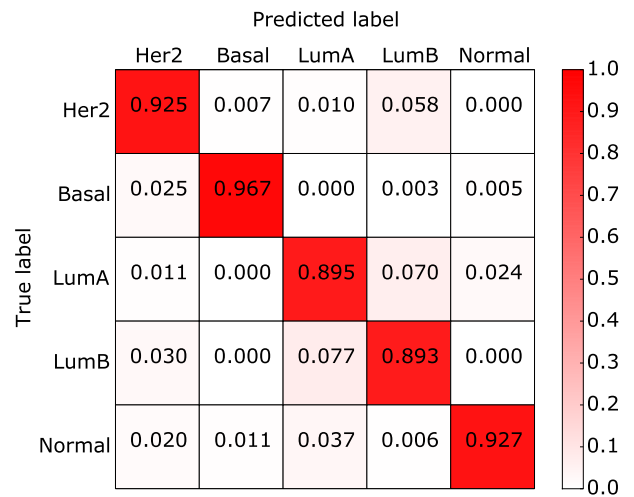

**sample size 300**

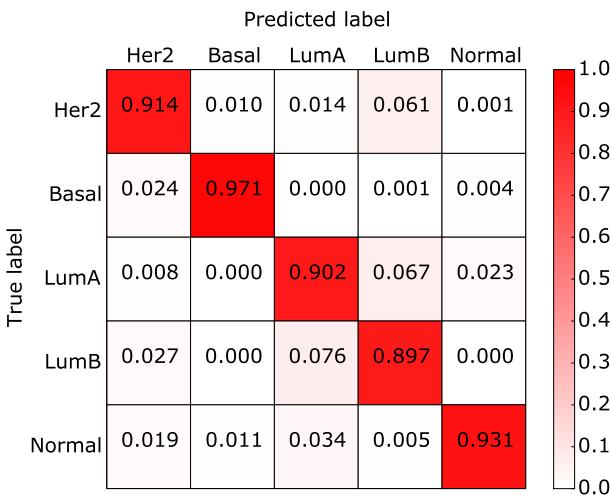

**sample size 350**

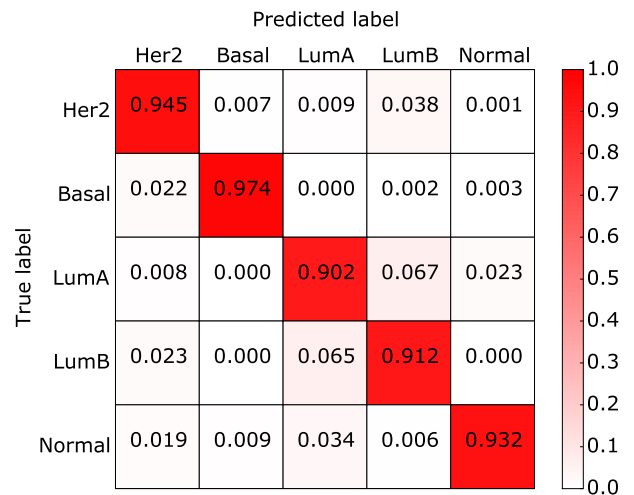

**sample size 400**

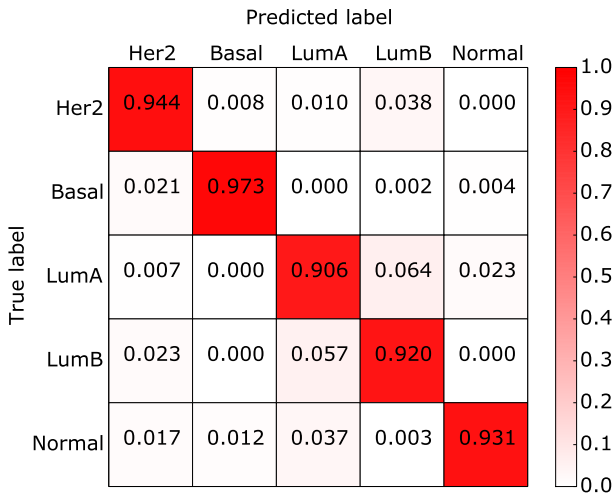

**sample size 450**

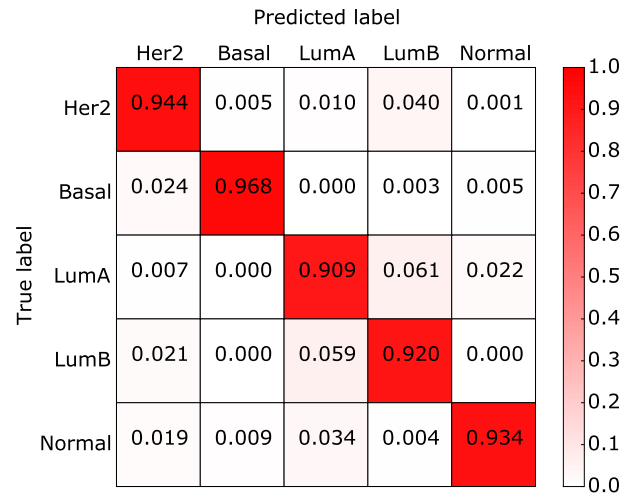

**sample size 500**

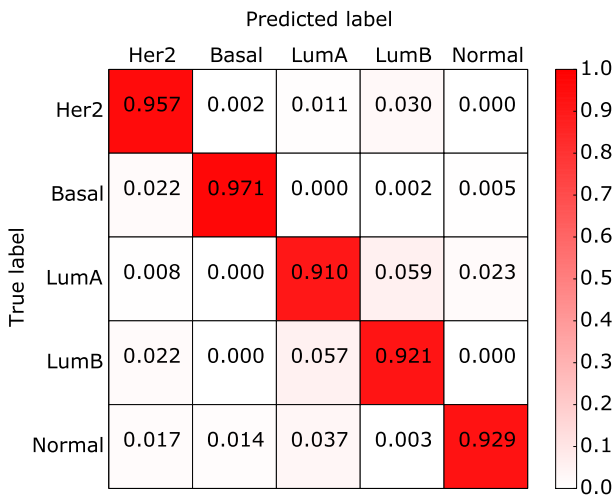

**sample size 550**

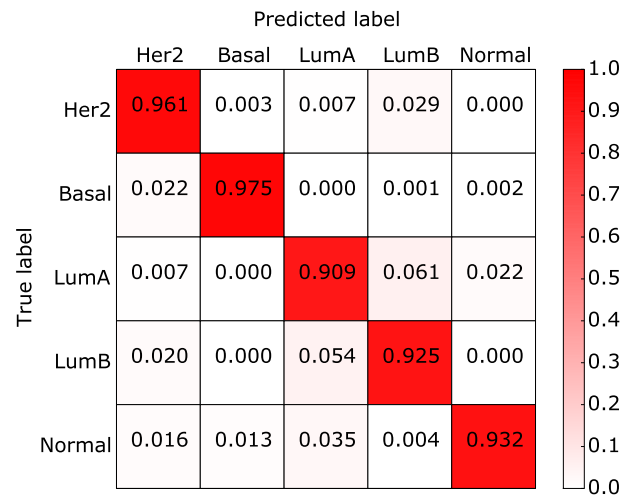

**sample size 600**

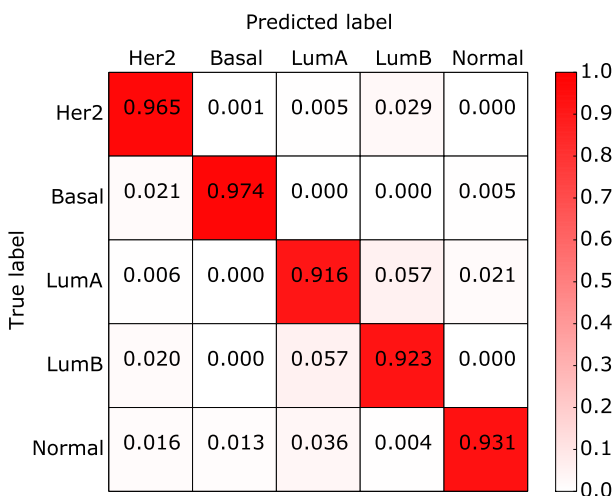

**sample size 650**

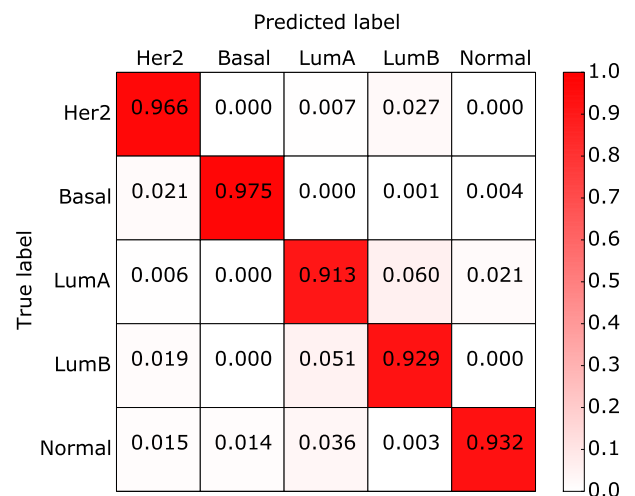

**sample size 700**

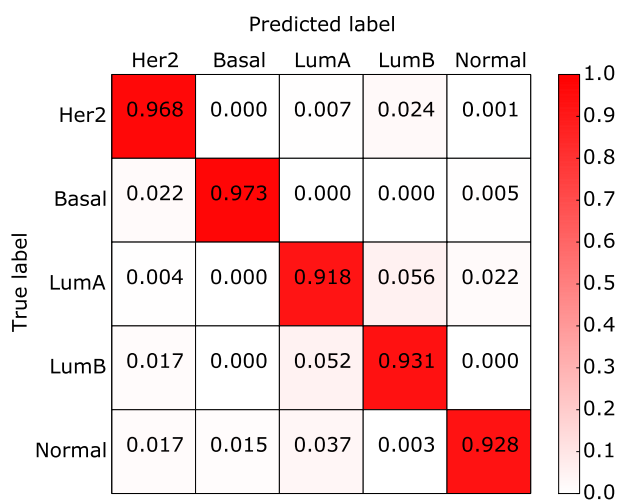

**sample size 750**

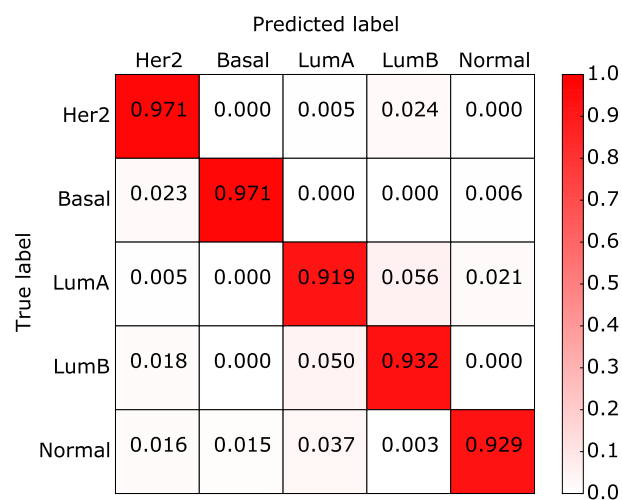

**Table S2: Confusion matrix for Top25 dataset and Elastic net classifier**

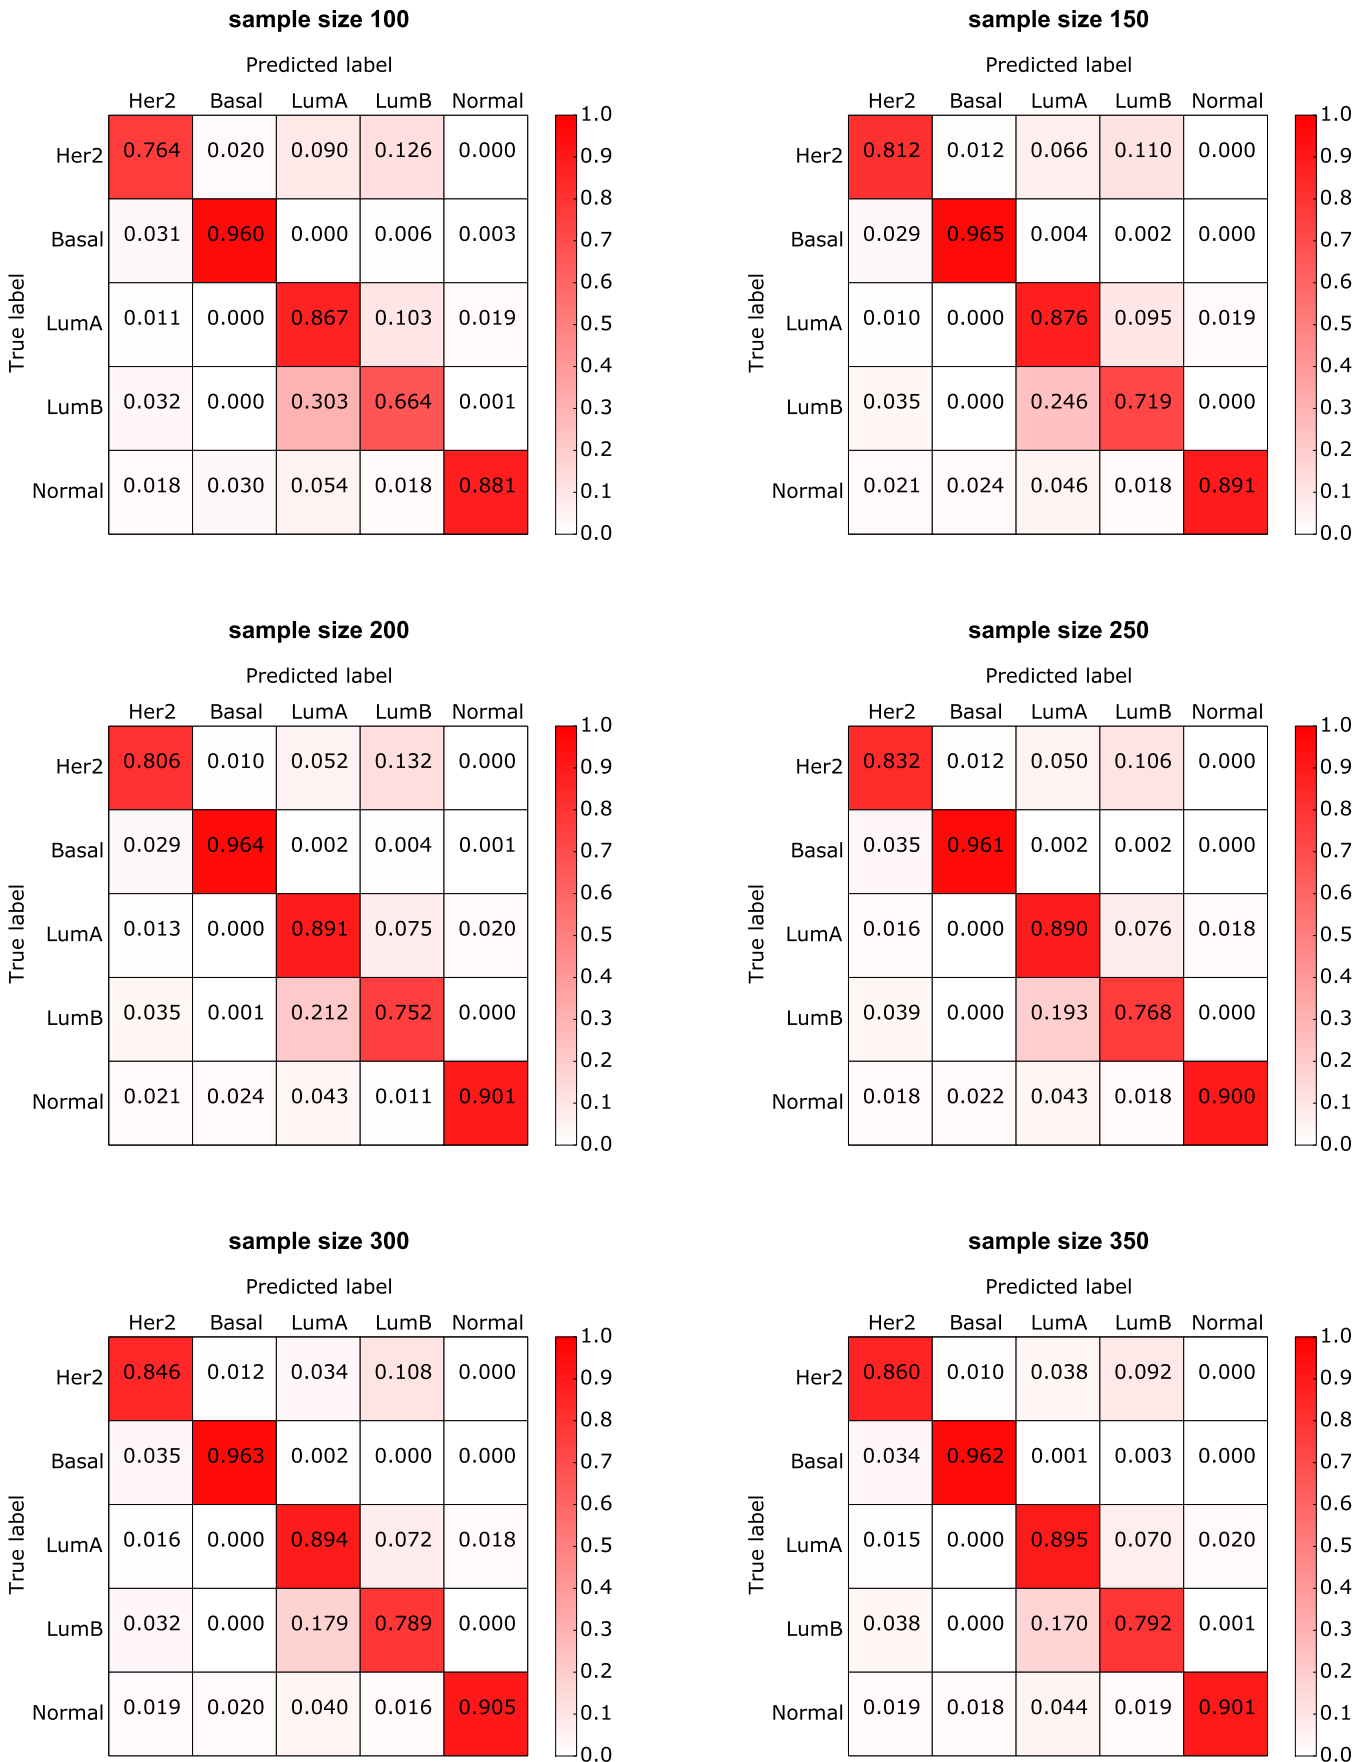

**sample size 400**

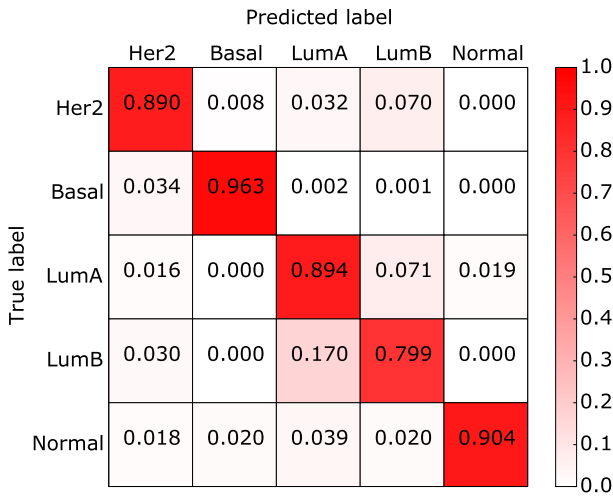

**sample size 450**

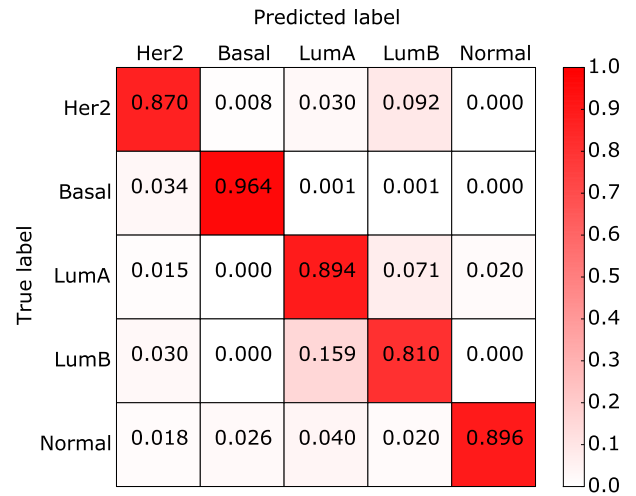

**sample size 500**

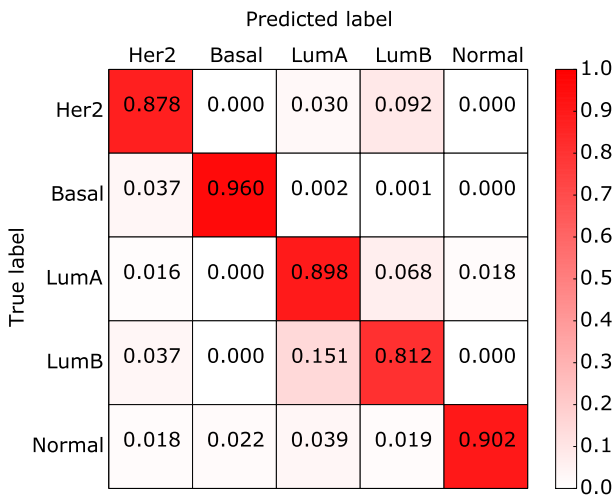

**sample size 550**

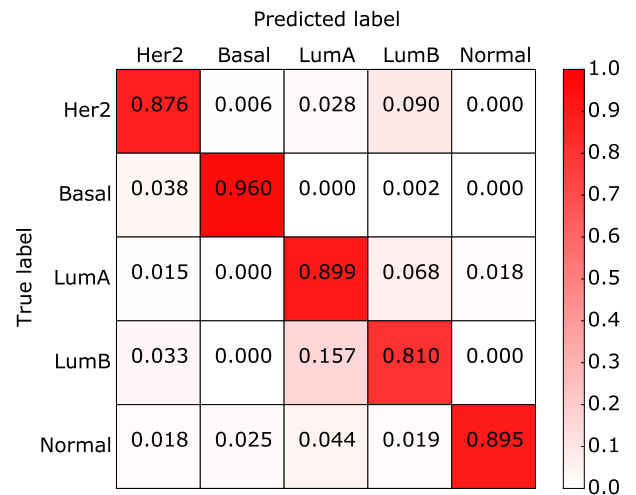

**sample size 600**

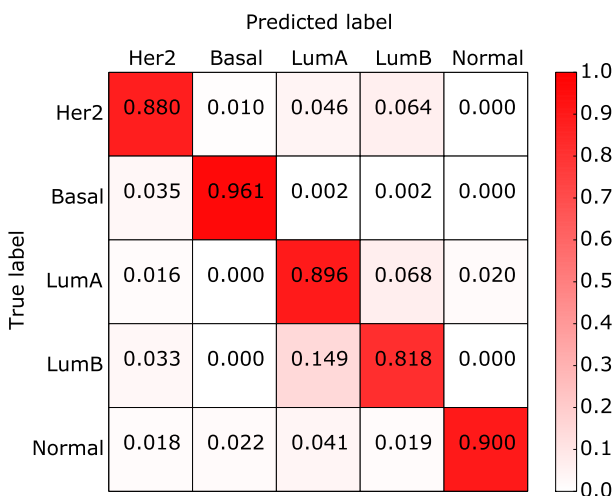

**sample size 650**

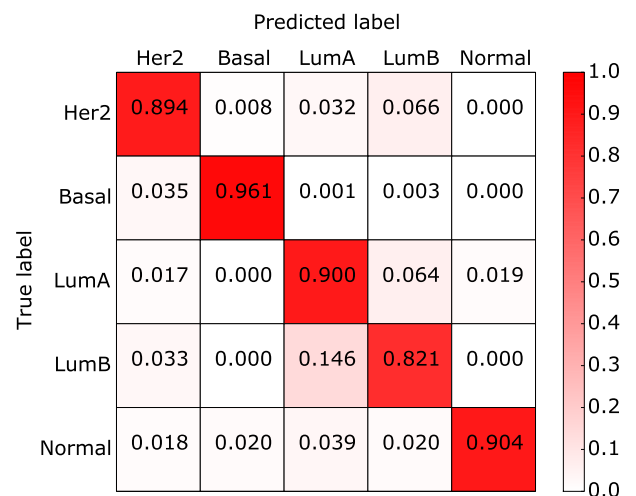

**sample size 700**

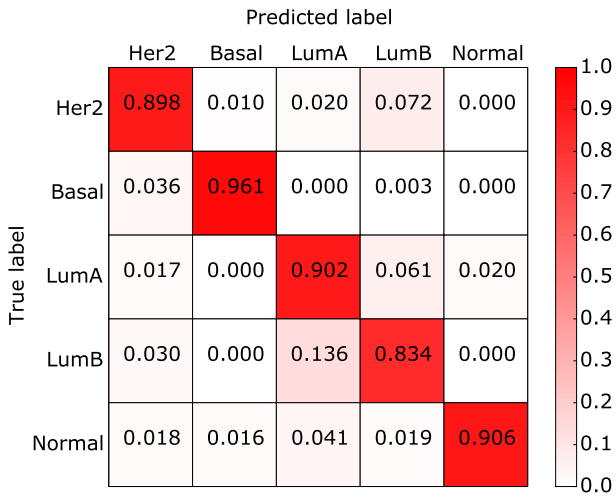

**sample size 750**

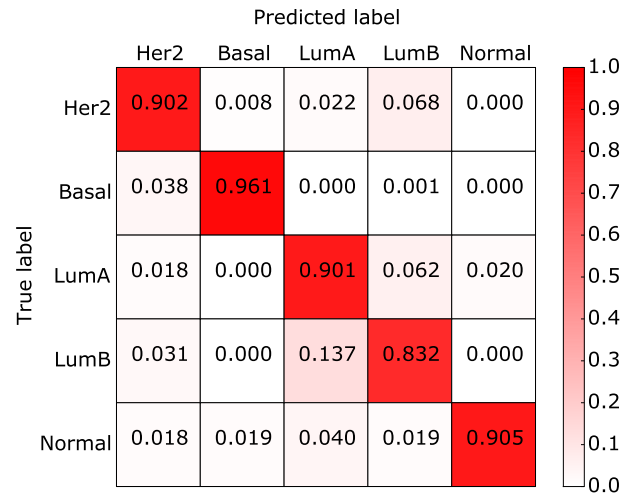

**Table S3: Confusion matrix for PAM50 dataset and unsupervised learning**

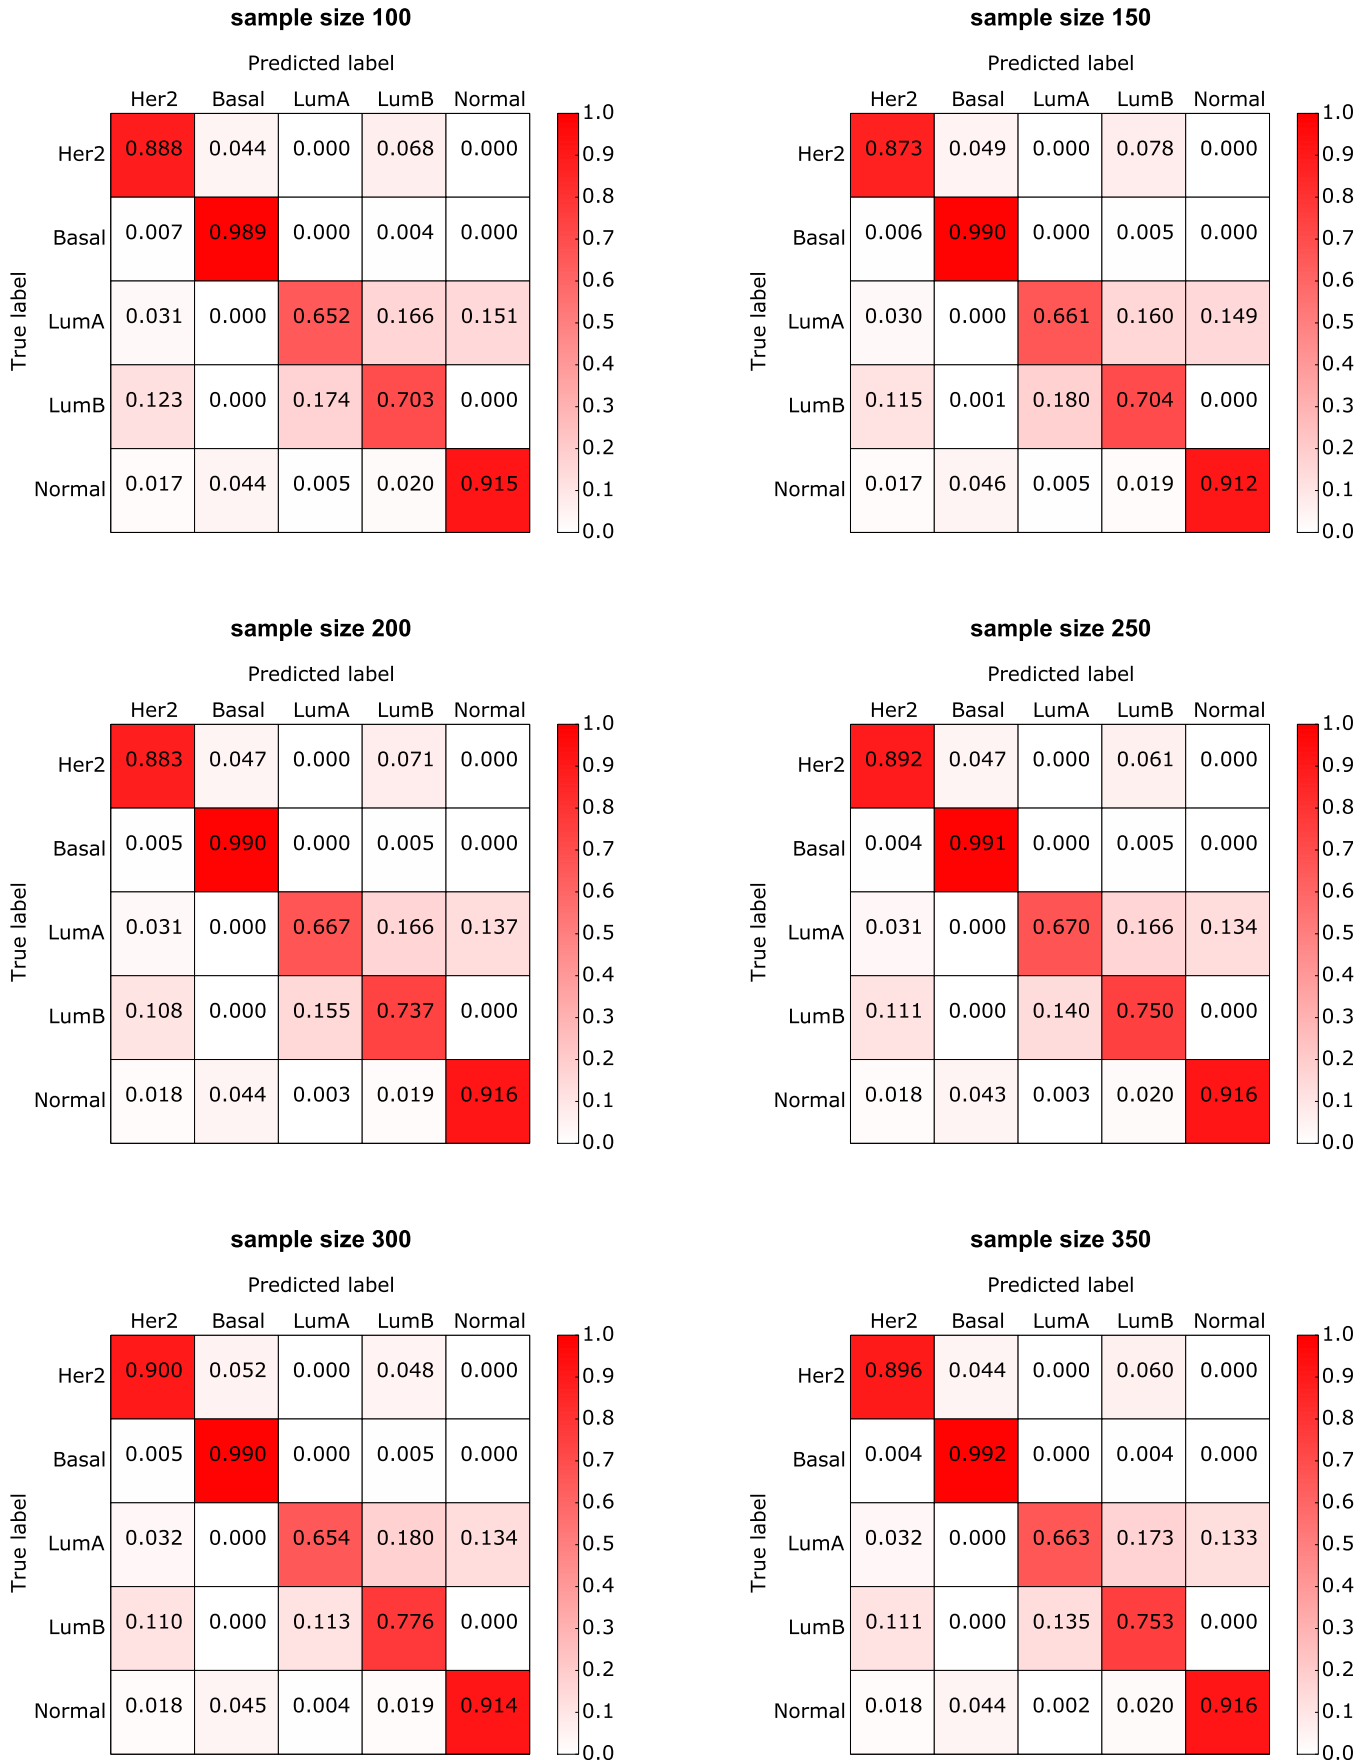



**sample size 400**

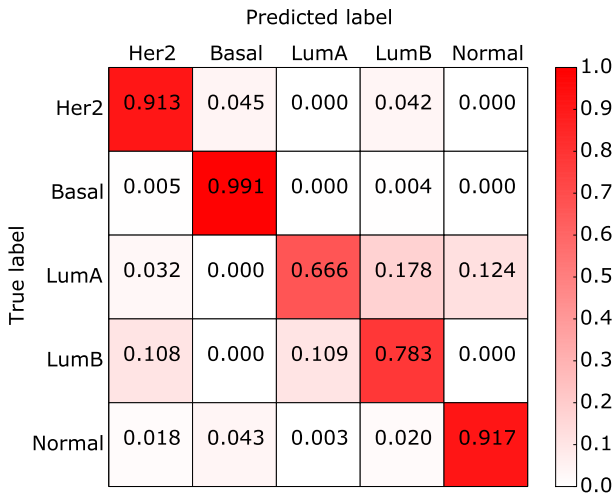

**sample size 450**

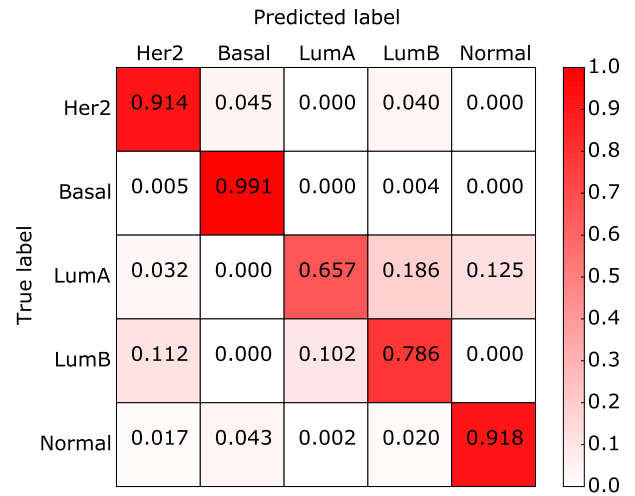

**sample size 500**

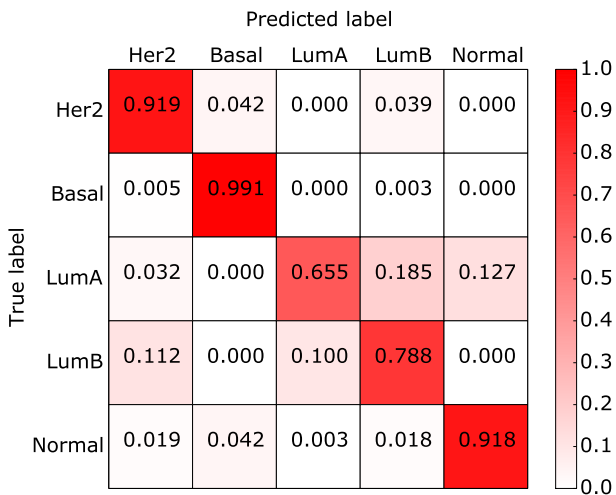

**sample size 550**

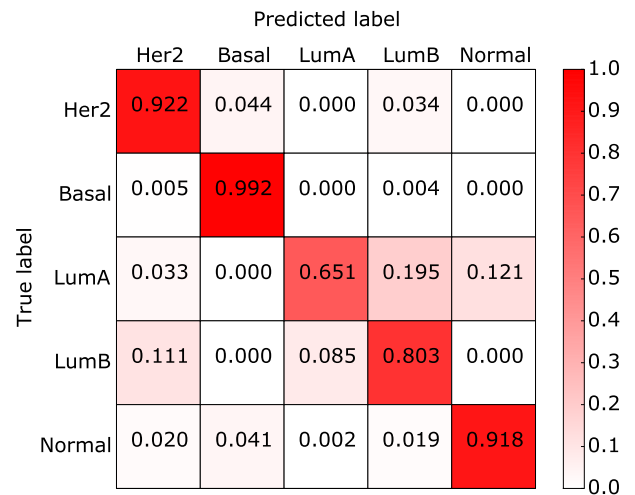

**sample size 600**

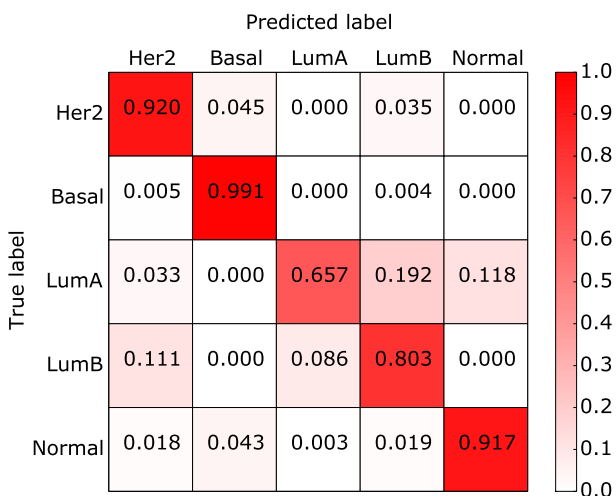

**sample size 650**

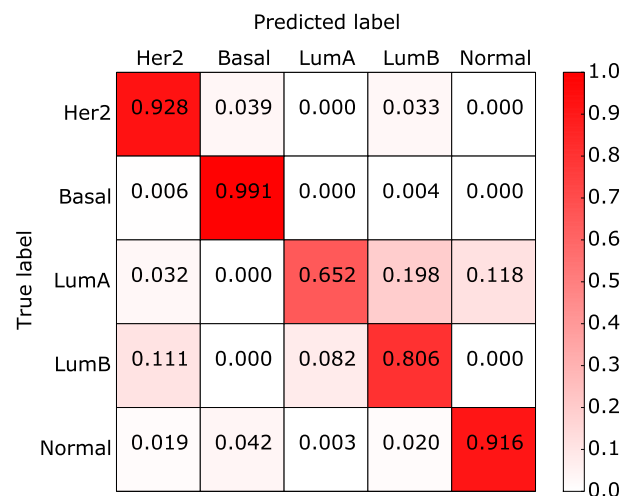

**sample size 700**

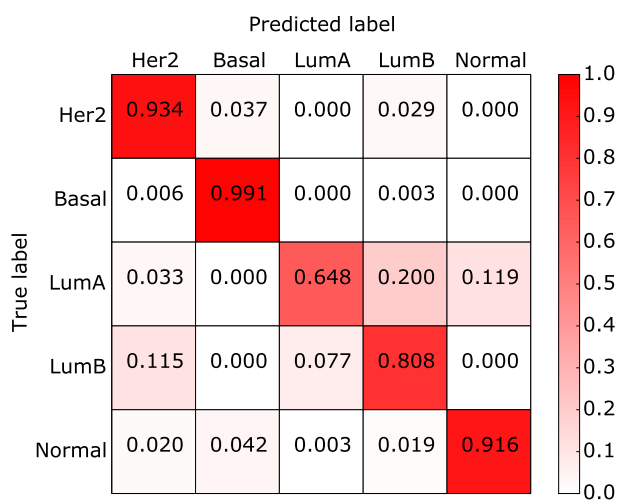

**sample size 750**

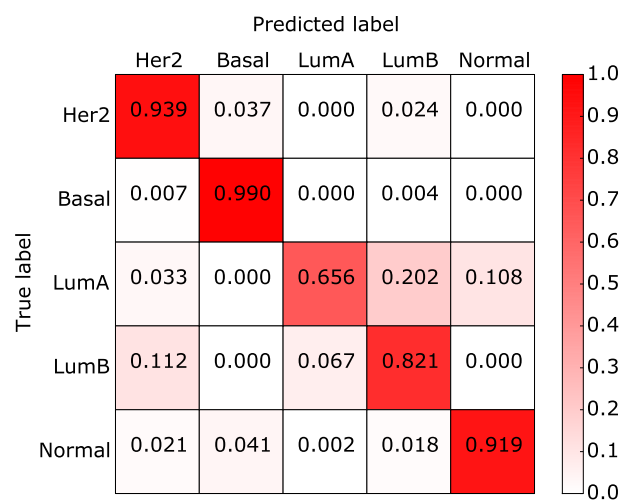

**Table S4: Confusion matrix for Top25 dataset and unsupervised learning**

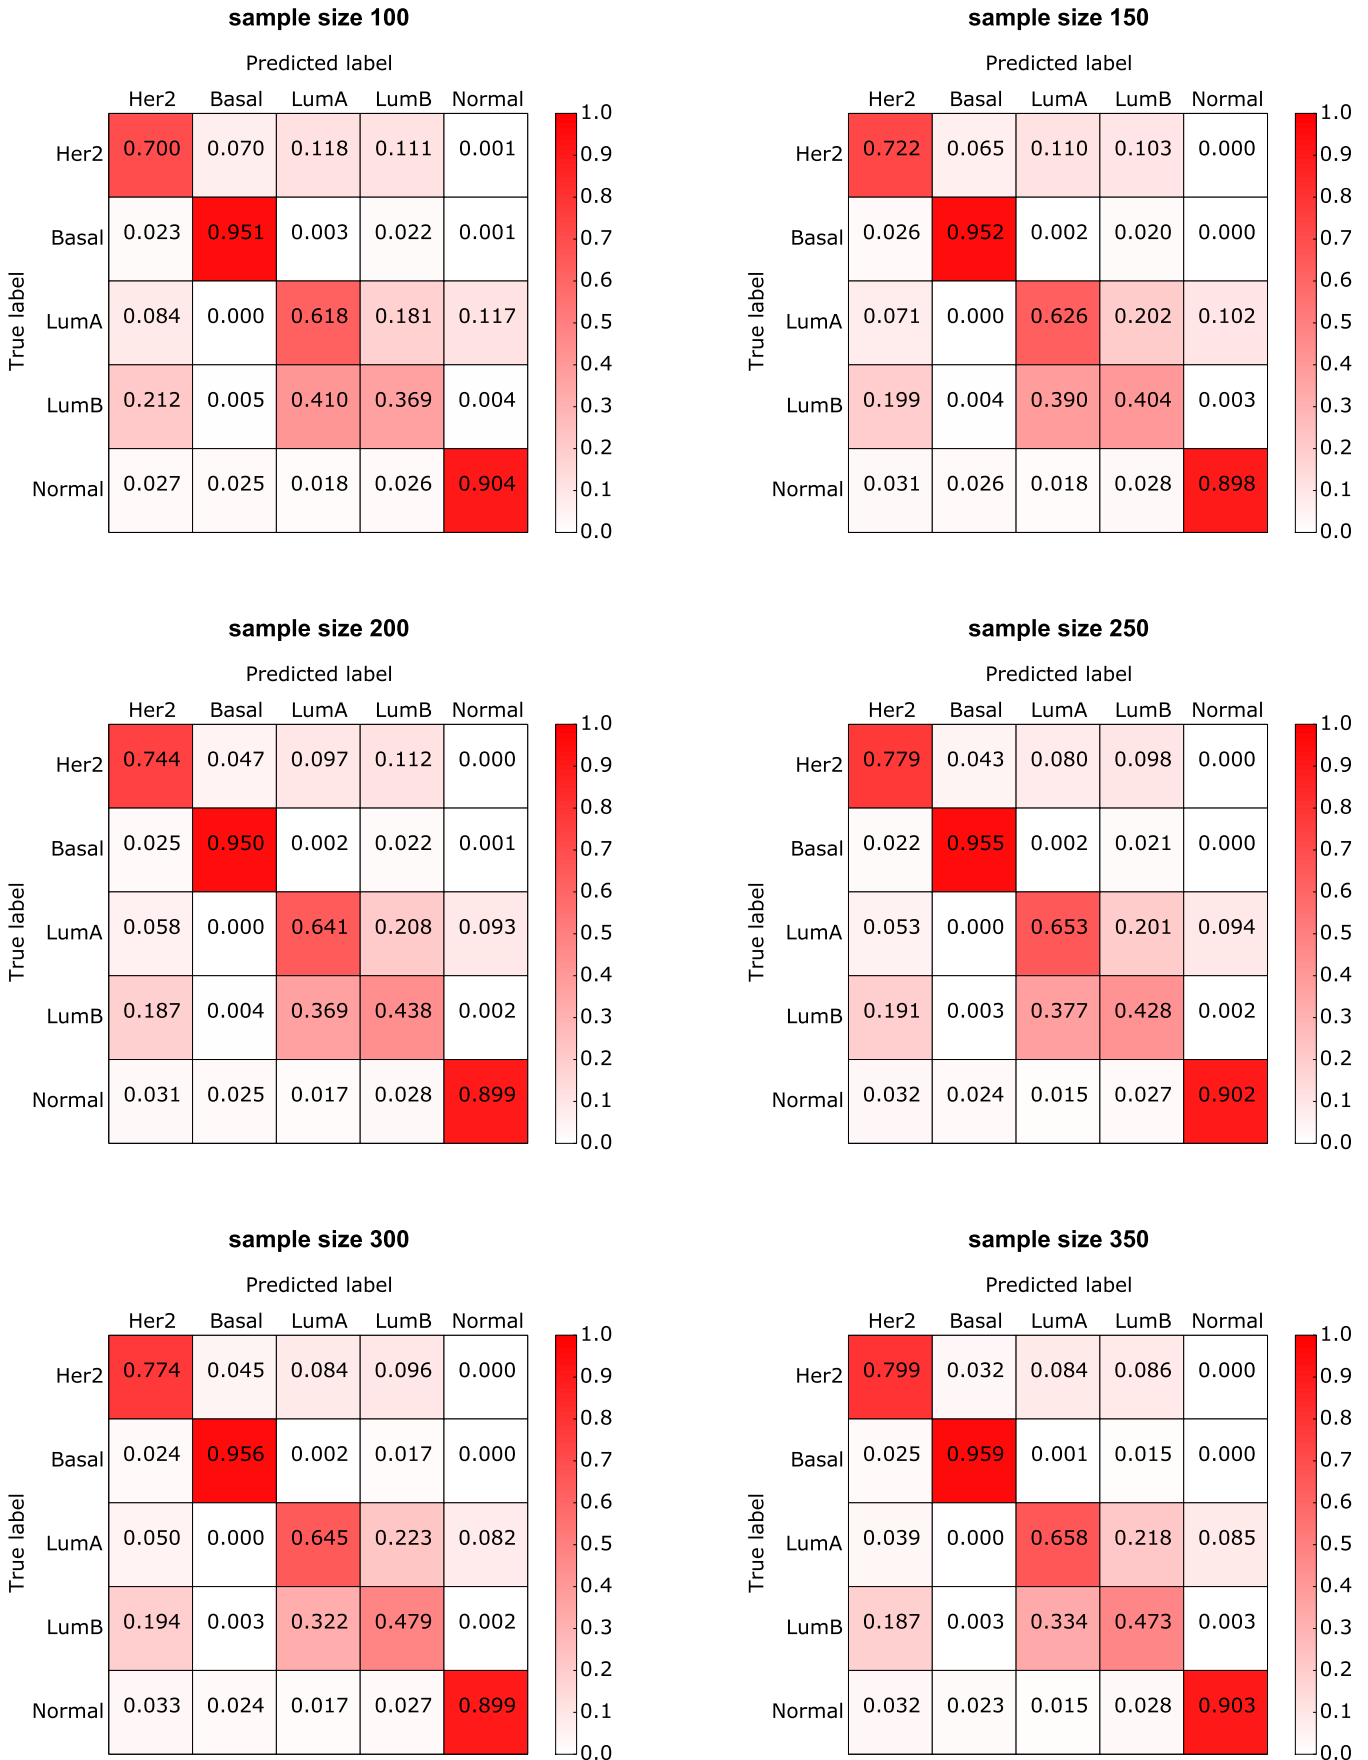

**sample size 400**

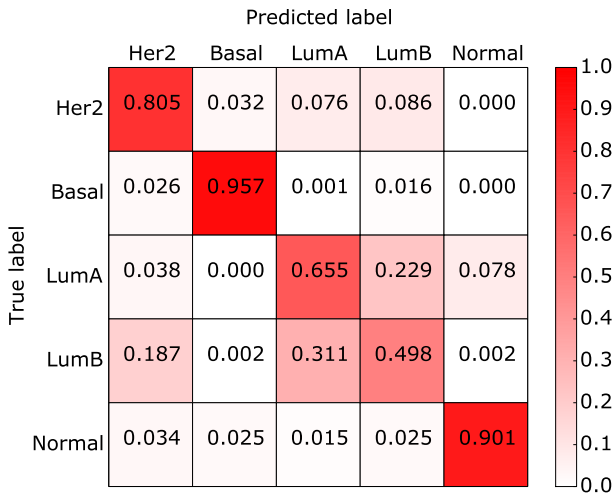

**sample size 450**

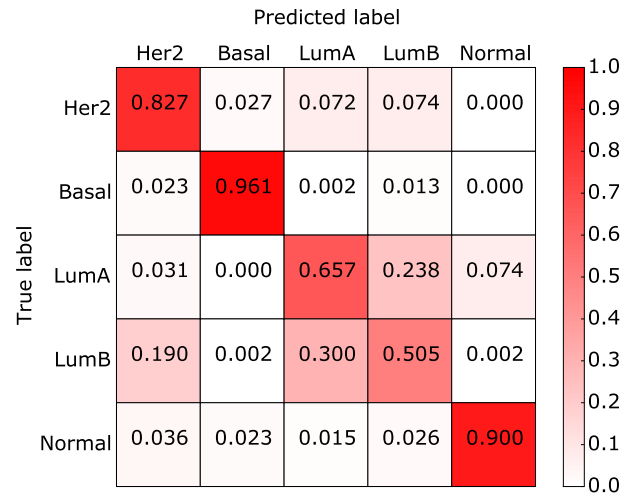

**sample size 500**

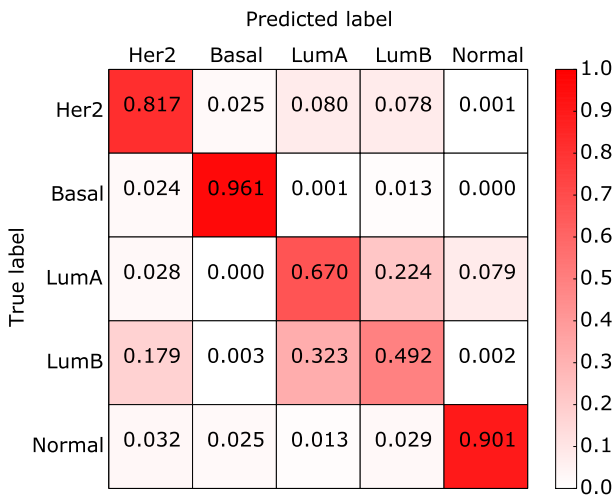

**sample size 550**

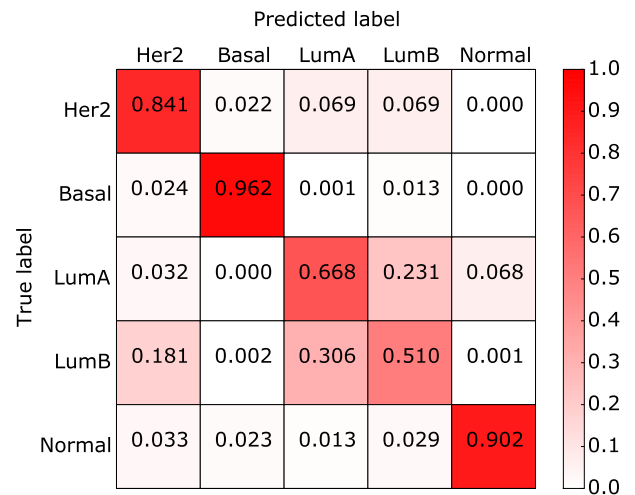

**sample size 600**

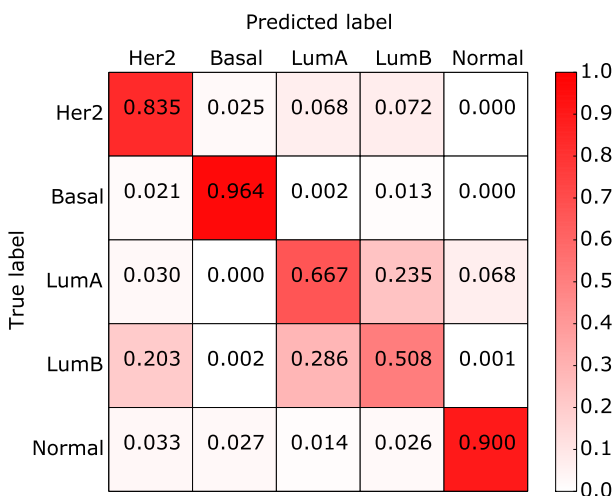

**sample size 650**

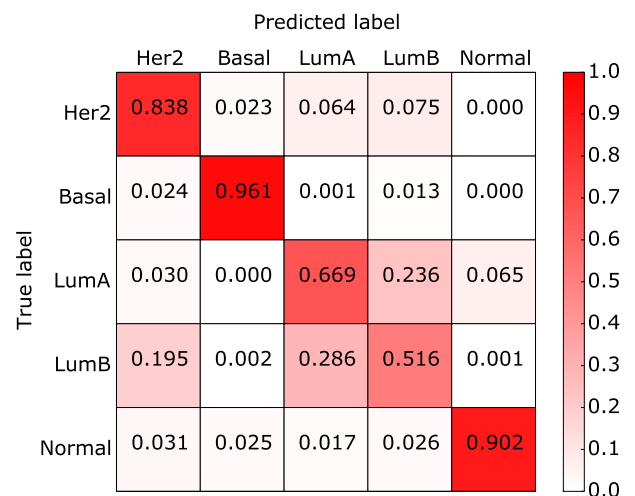

**sample size 700**

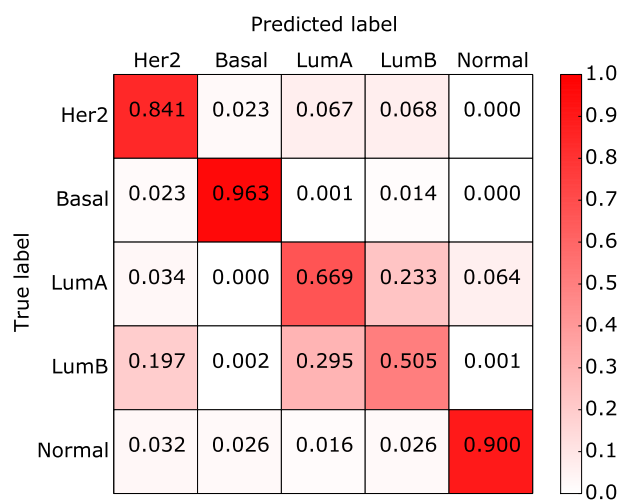

**sample size 750**

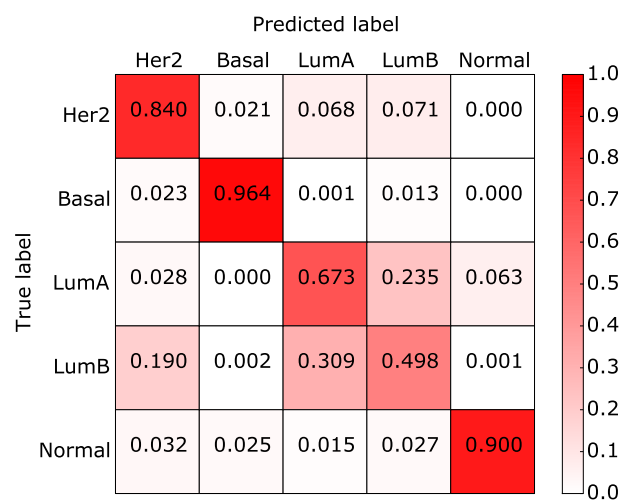

Supplement: srep20200-s1.pdf [file srep20200-s1.pdf]
